# Supplementary material
Source: ML conference proceedings conference paper supplement (https://openreview.net/forum?id=xCVJMsPv3RT)

## 1. Introduction:

- In general, RL methods that are not only **sample efficient** but also **computational efficient** (i.e., **doubly efficient**) are preferable.

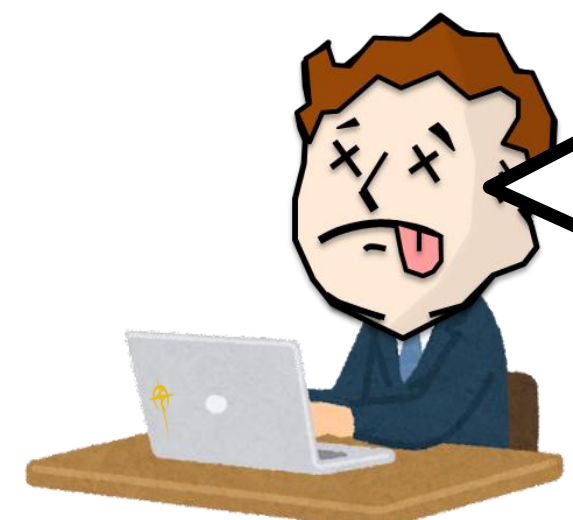

EVERYONE SAYS THIS RL ALGORITHM IS SAMPLE EFFICIENT, BUT IT'S TOO SLOW AND TOO HEAVY TO RUN ON MY LAPTOP. NOT SURE WHEN MY HYPER-PARAMETER TUNING ENDS...

- We propose DroQ, a simple but doubly efficient RL method, by introducing a small ensemble of *Dropout Q-functions* (🍬) to REDQ.

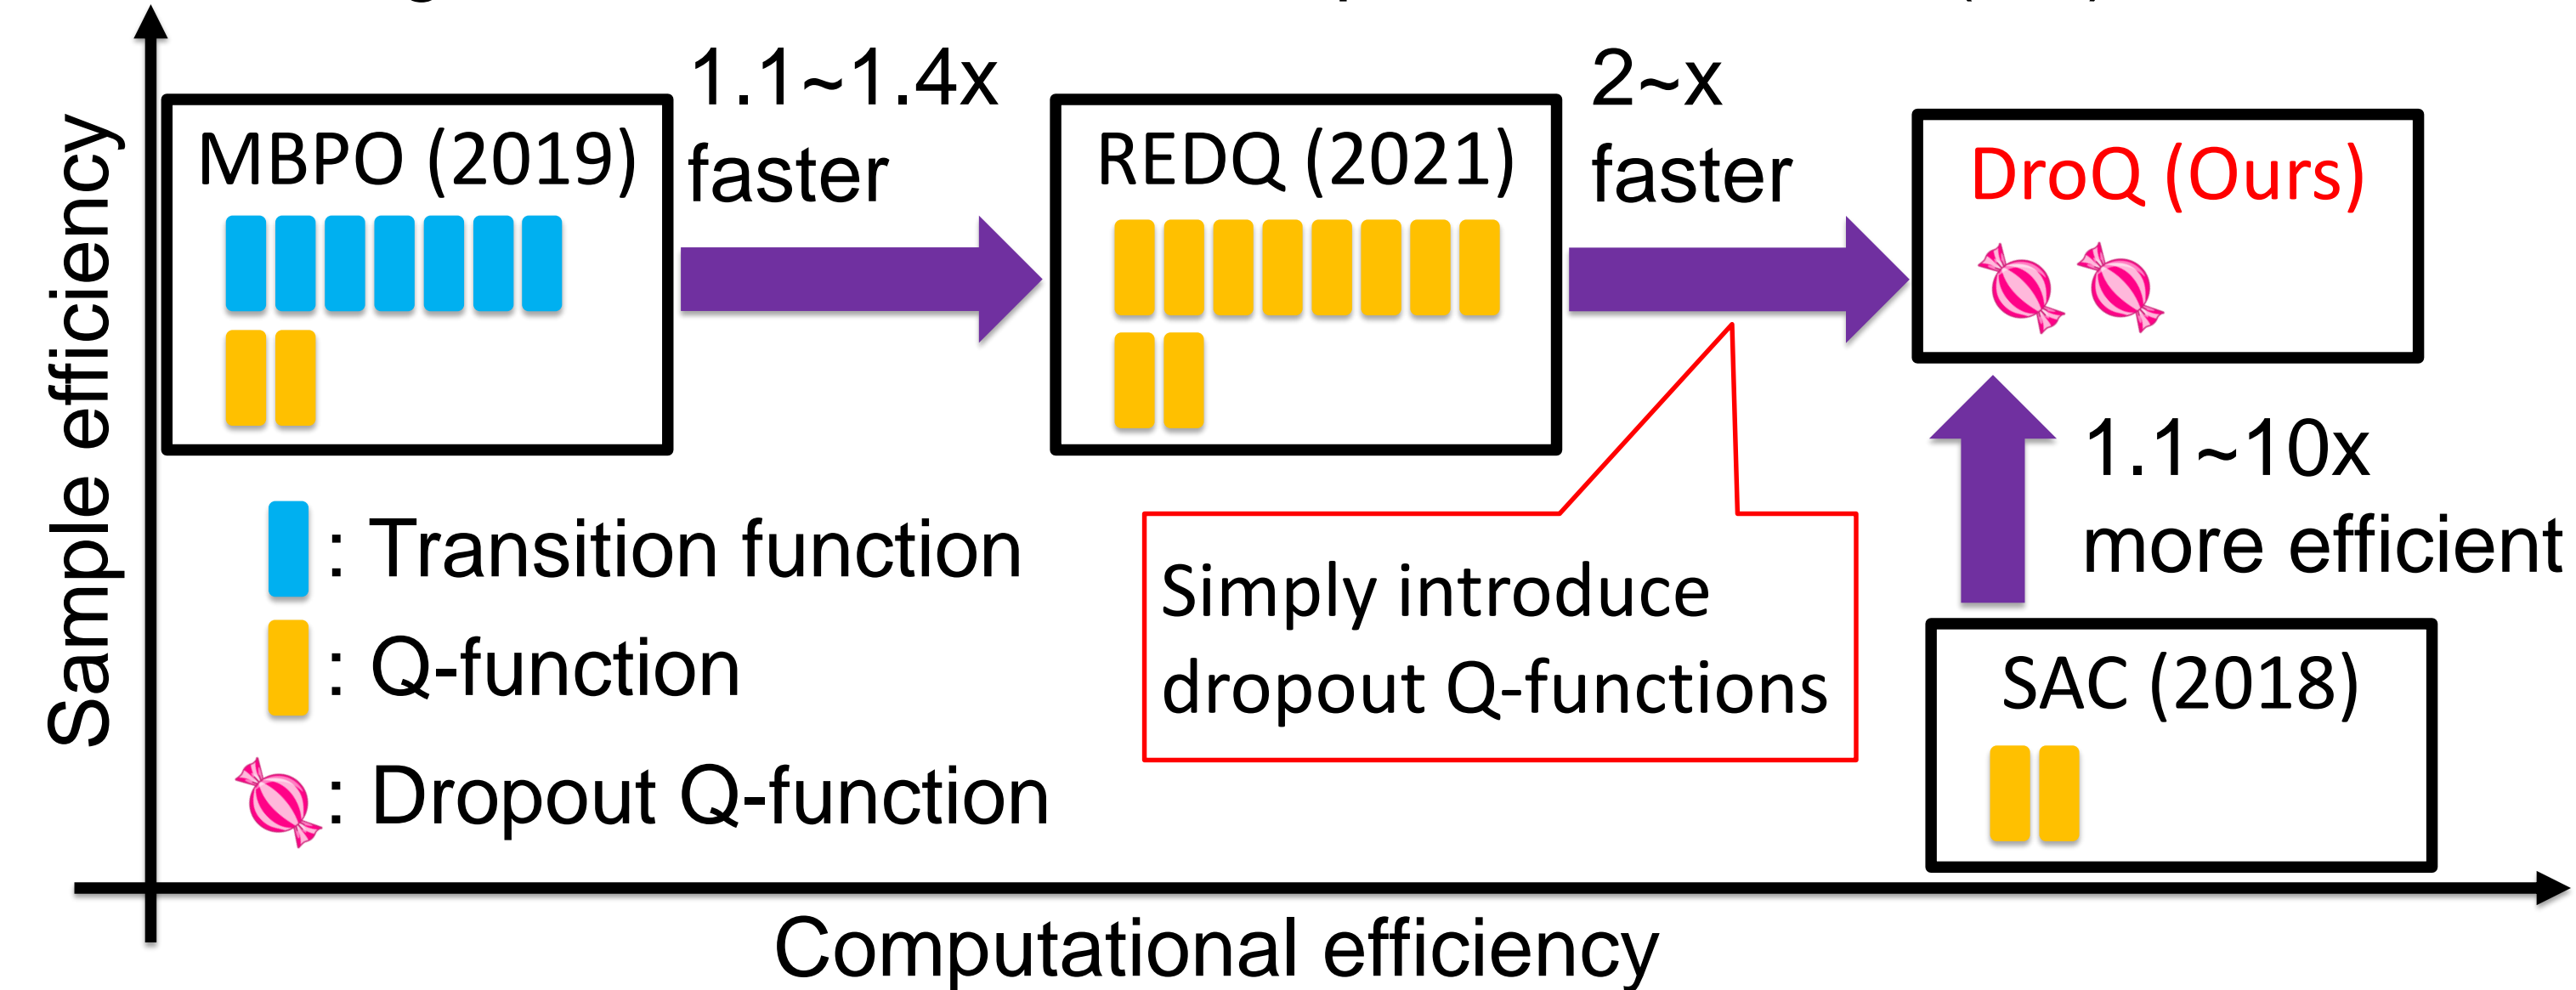

## 2. Randomized Ensembled Double Q-Learning (REDQ):

- REDQ (Chen, 2021) is a sample-efficient RL method equipped with **high update-to-data (UTD) ratio** and **randomized ensemble**.
- High UTD ratio**: number of Q updates (→) per environment interaction (↔) is high (e.g., 20 updates per interaction).
- Randomized ensemble**: a randomly selected subset (🍬...🍬) of ensemble (🍬...🍬) is used at the target (Min) in the Q update (→).

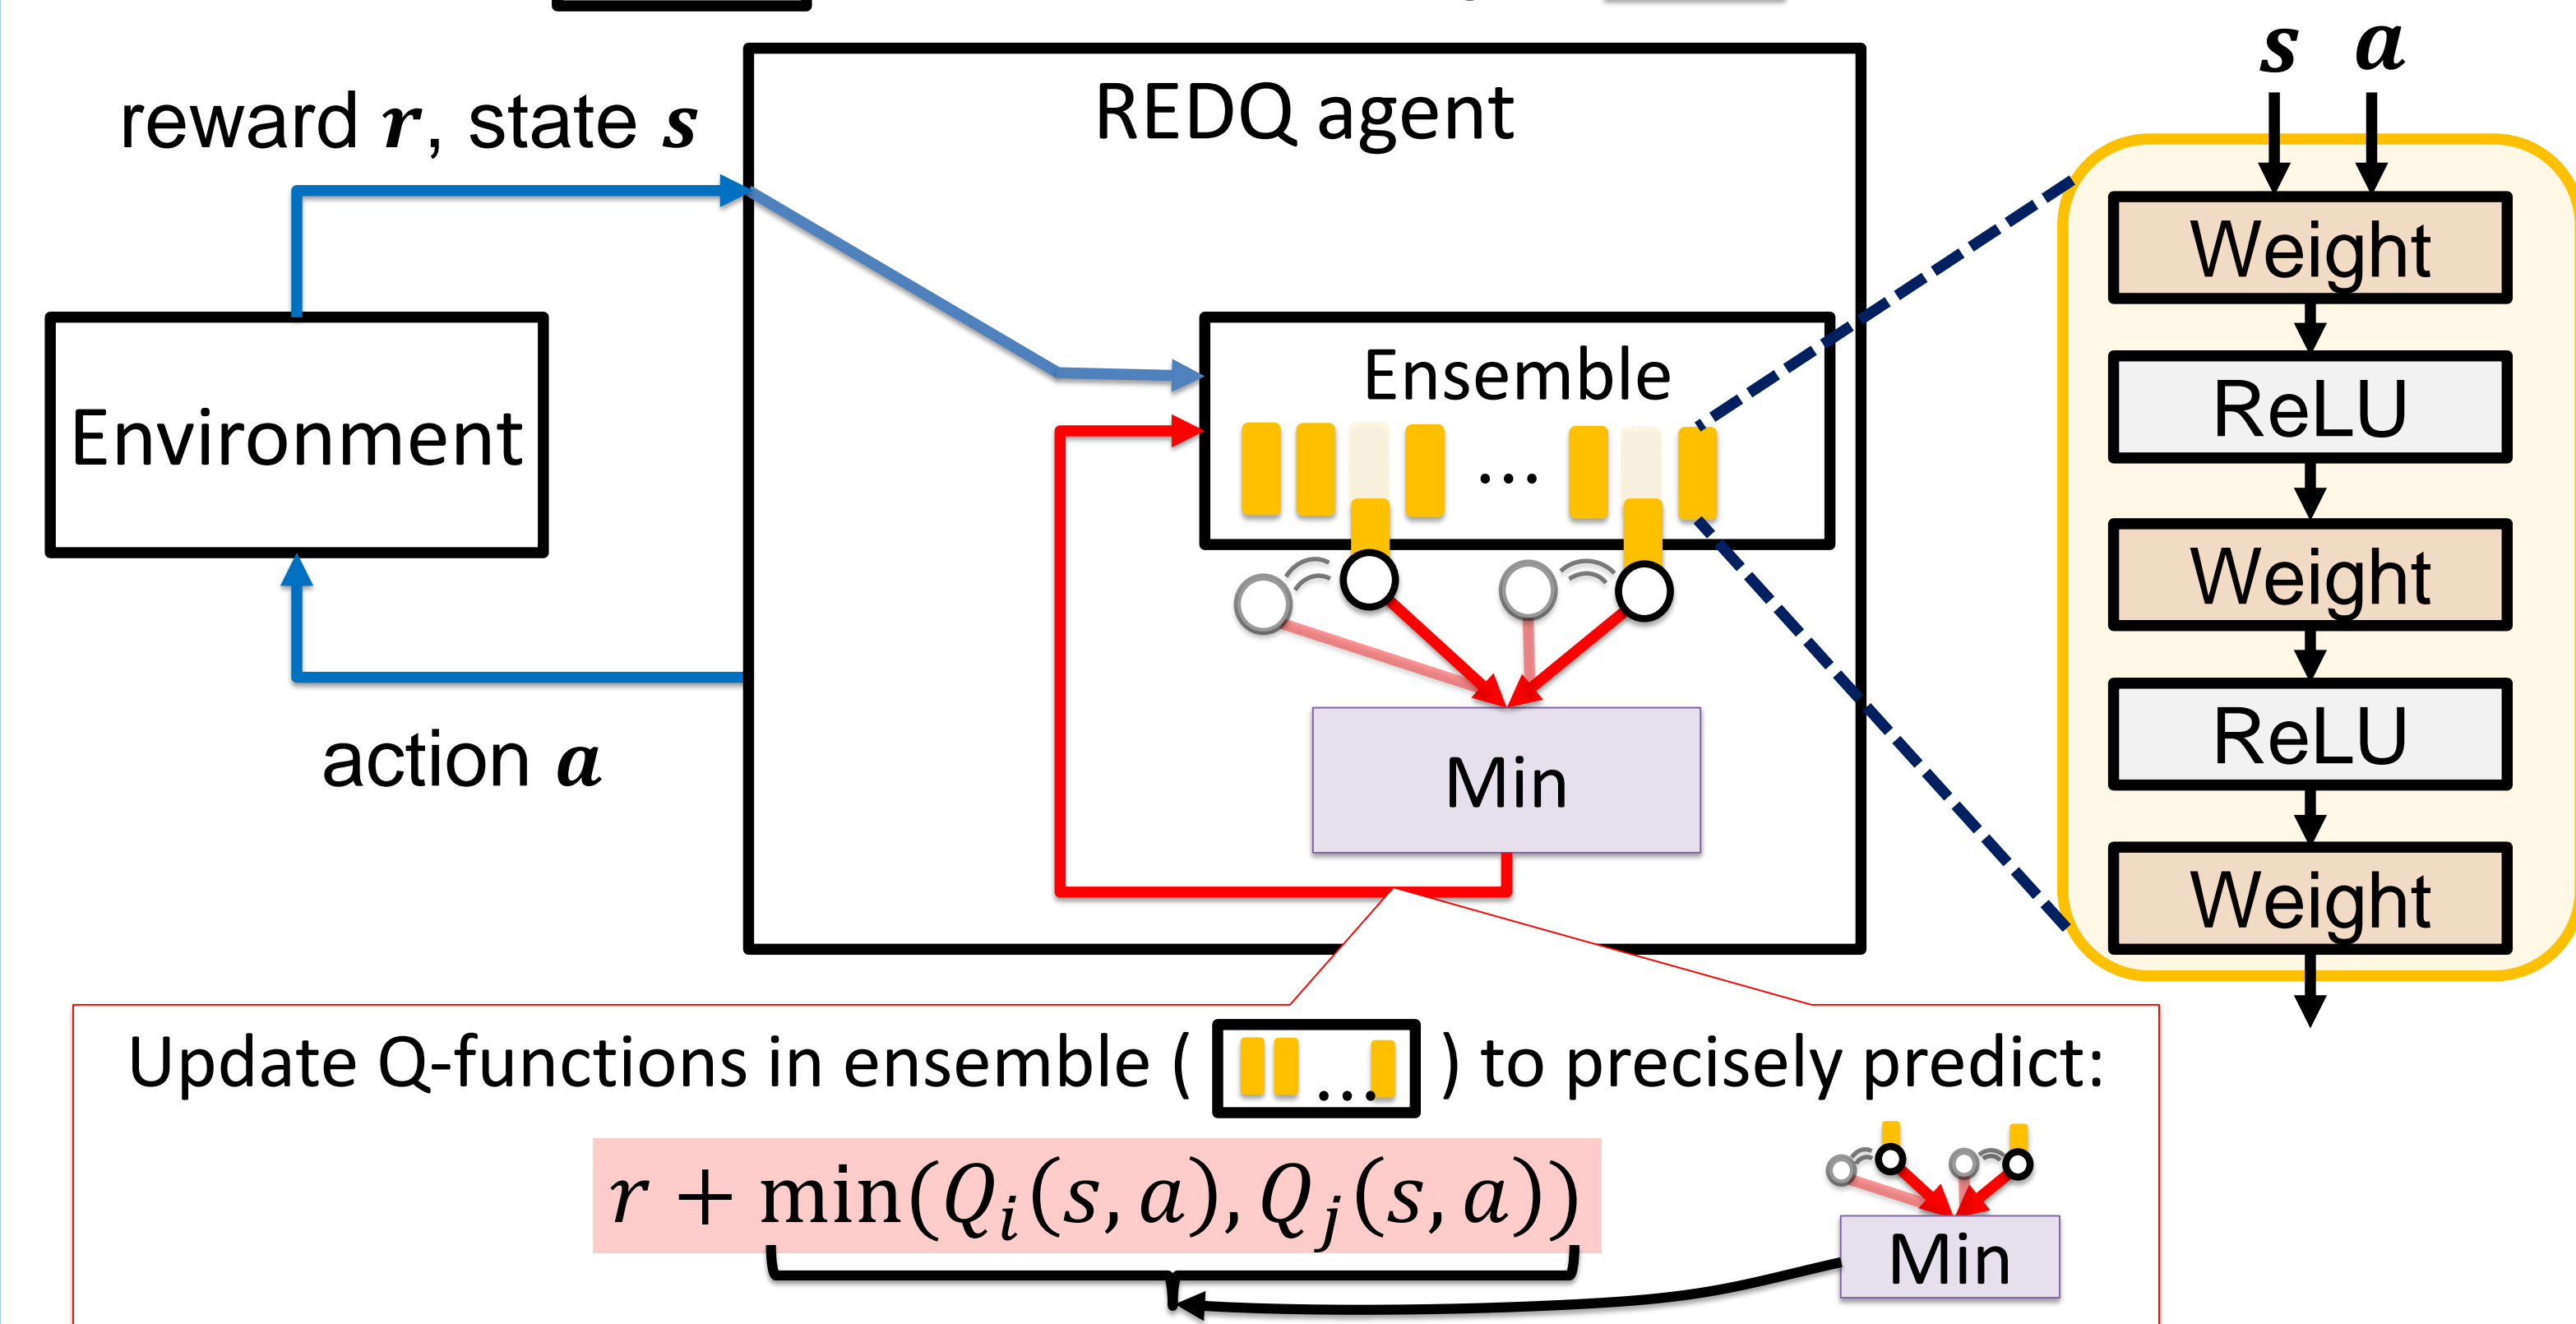

## 3. DroQ, the proposed method:

- DroQ is a REDQ variant using a **small ensemble of dropout Q-functions** (🍬) in which **dropout** (Dropout) and **layer normalization** (LayerNorm) are used.

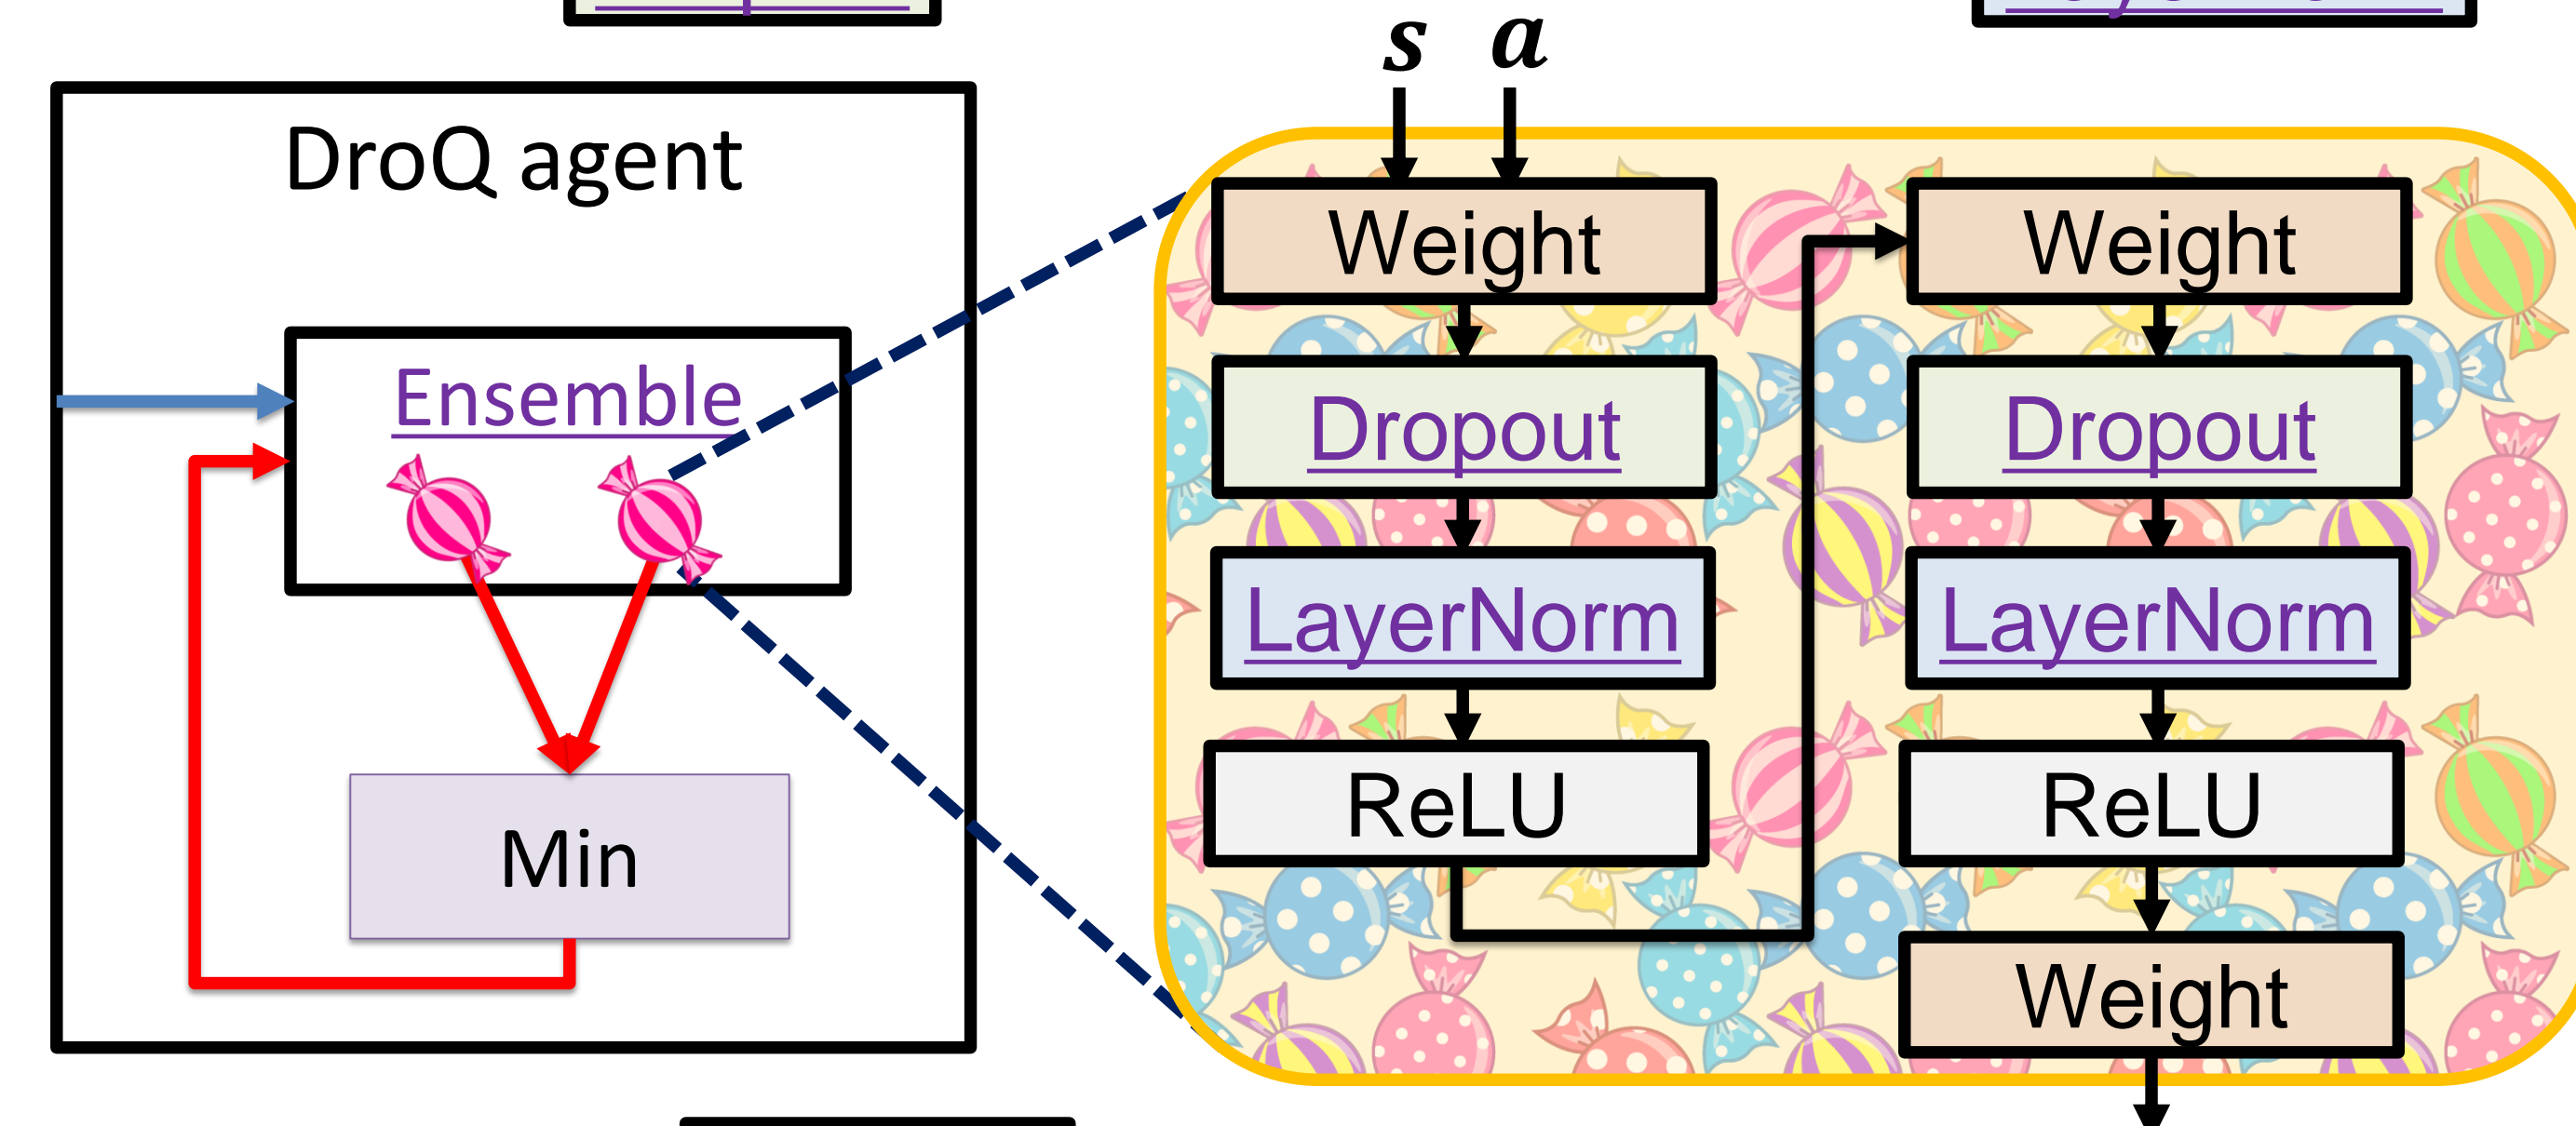

- Q. Why is dropout (Dropout) needed?**  
 A. To inject Q-function uncertainty (🎲) to the target (Min), similarly to REDQ.

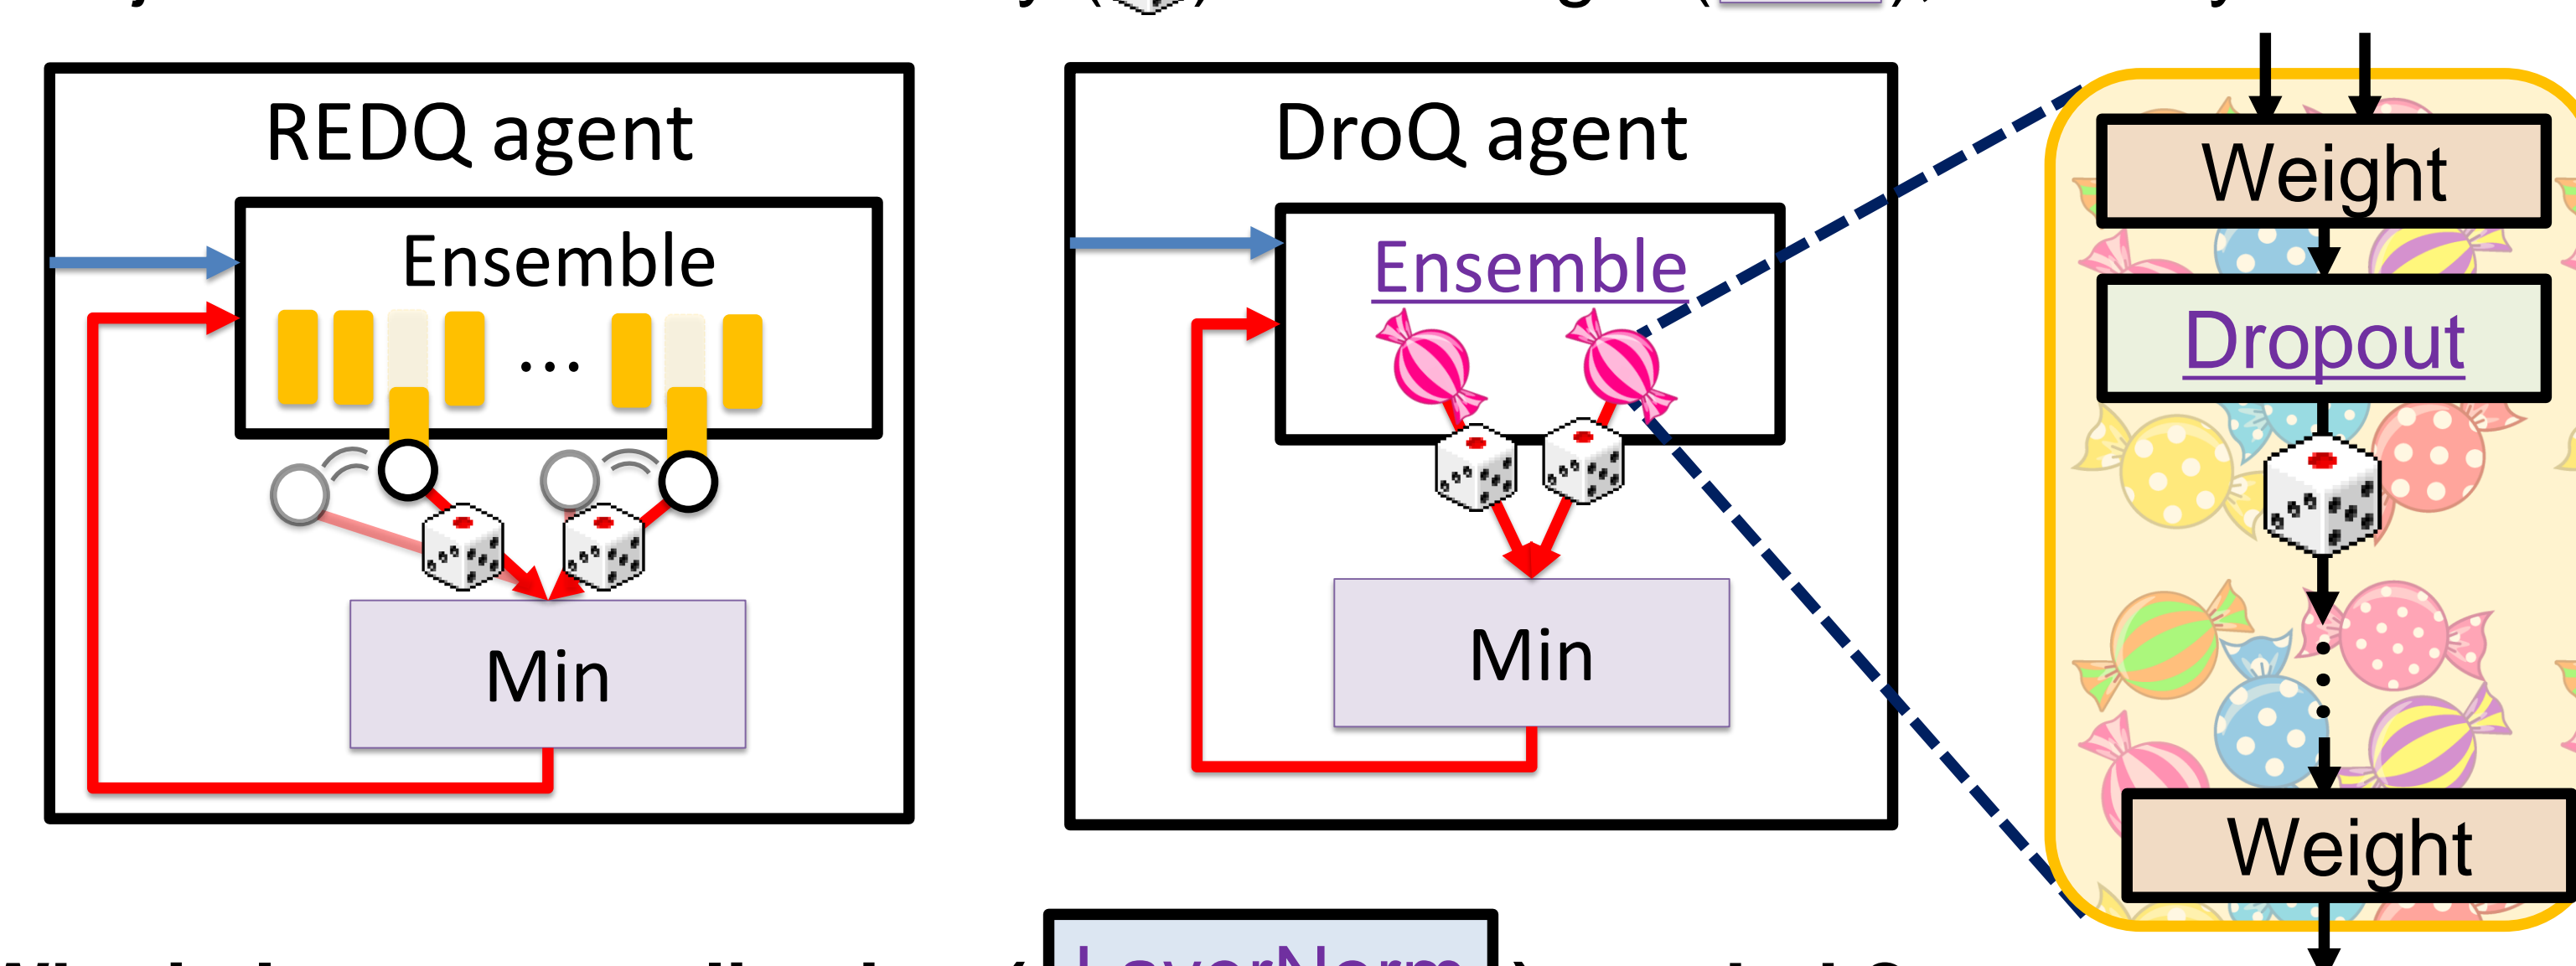

- Q. Why is layer normalization (LayerNorm) needed?**  
 A. To suppress (↓) the learning instability caused by dropout.

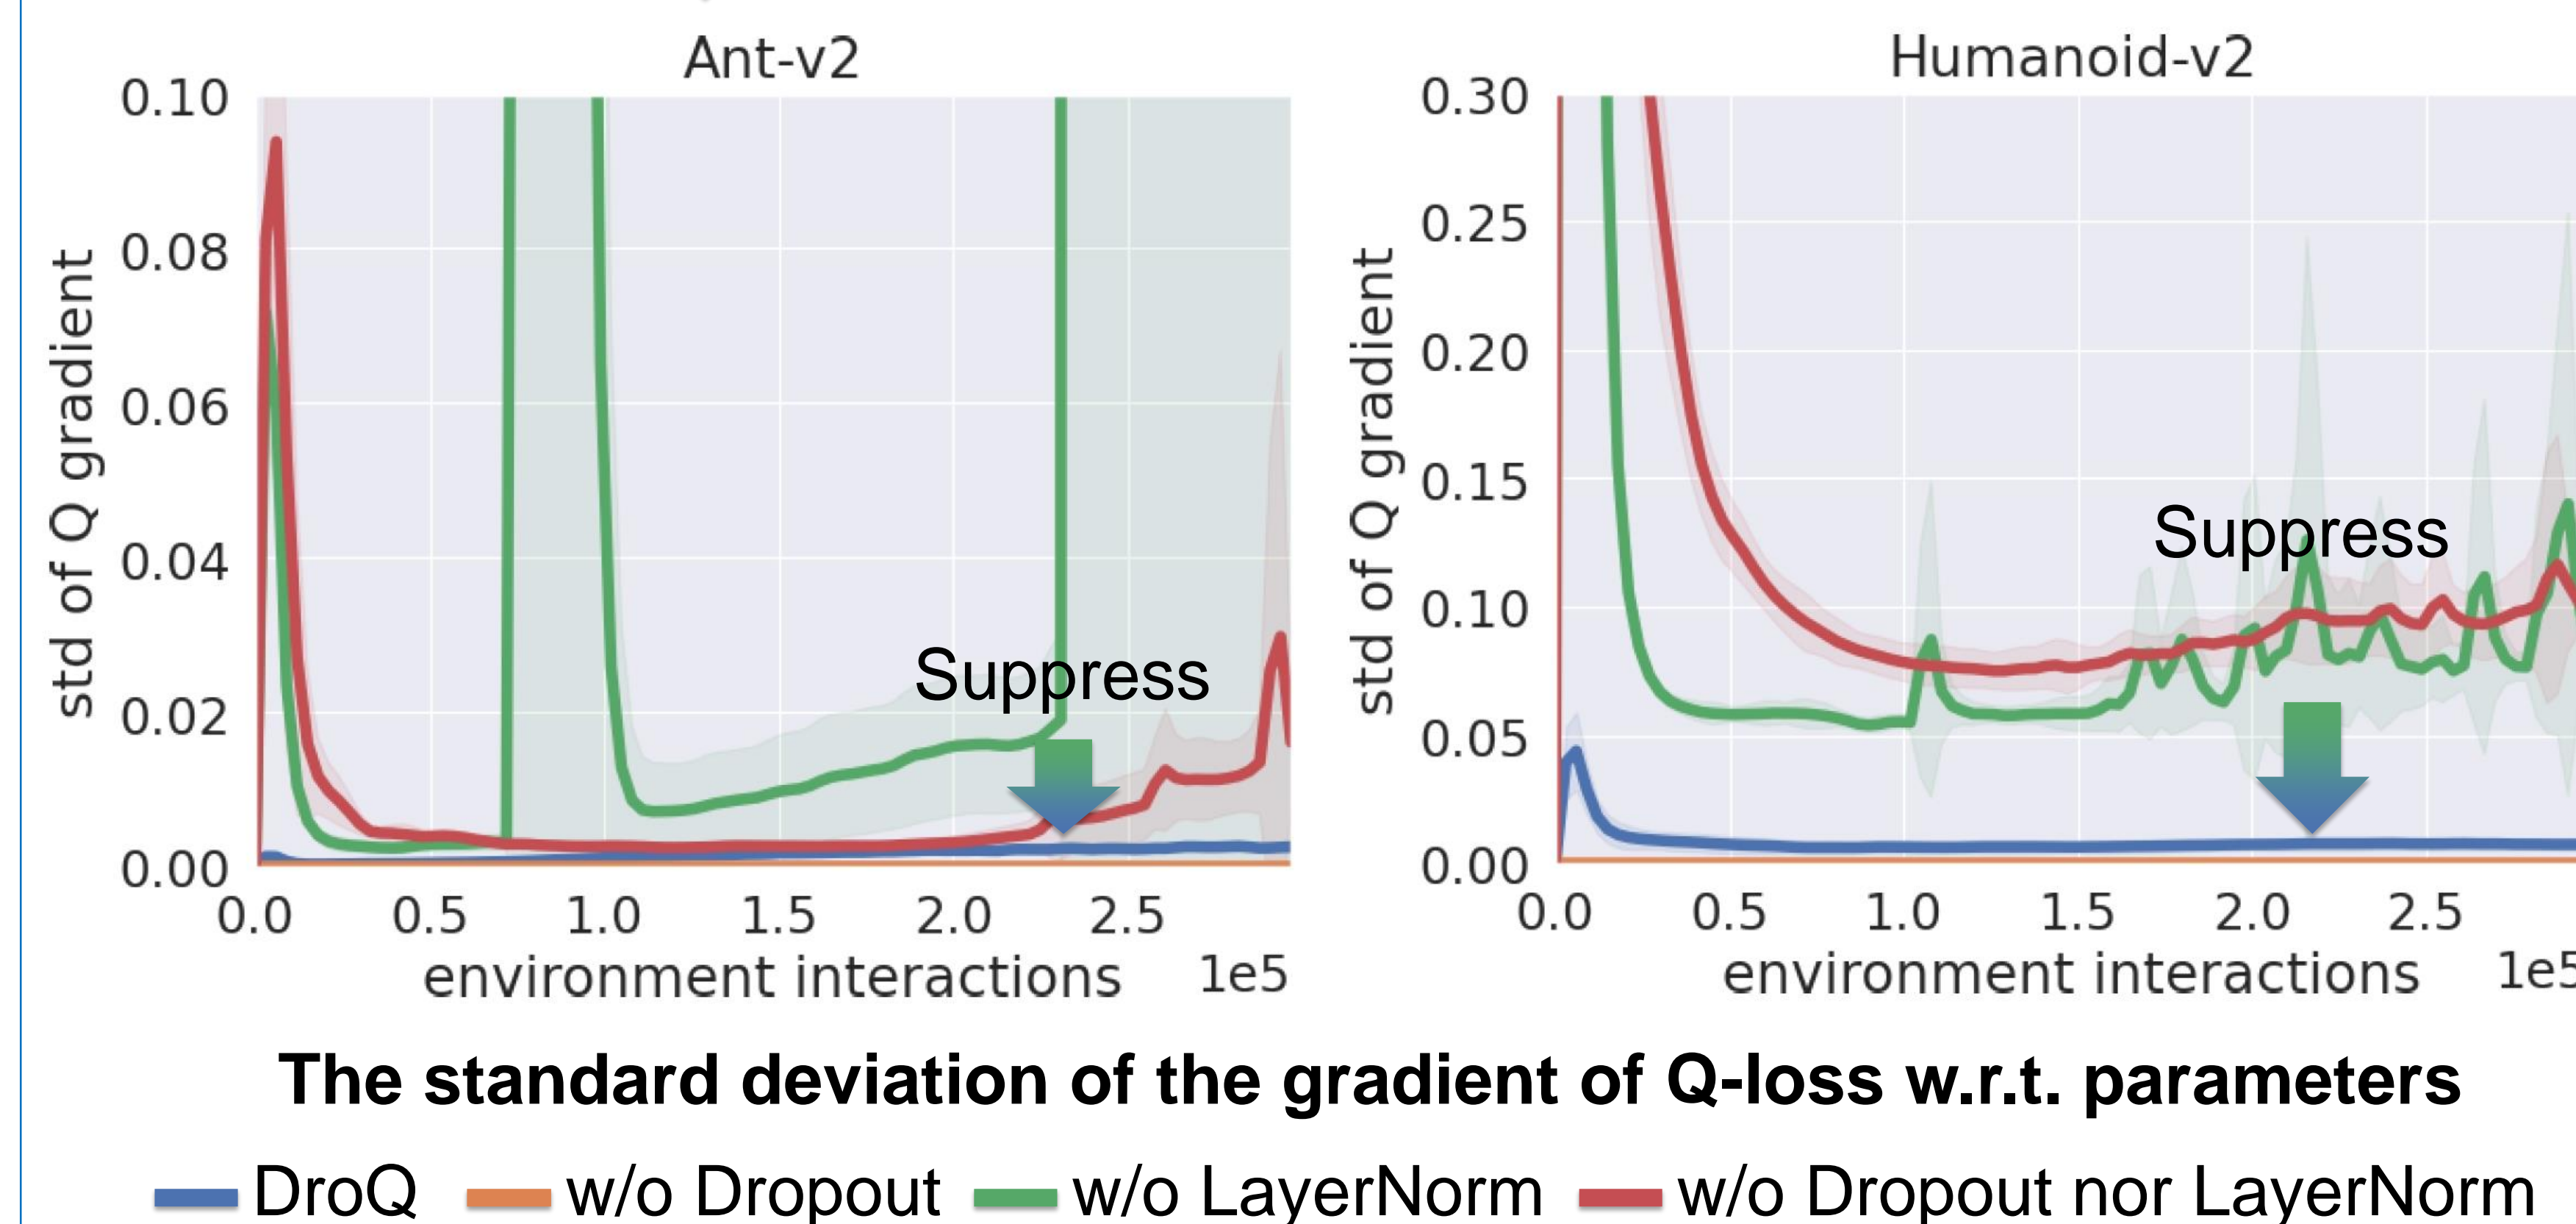

## 3.5. DroQ, the proposed method (Contd.):

- Q. Why is a small ensemble (🍬🍬) needed?**  
 (Why not use a single dropout Q-function (🍬) alone?)  
 A. Using it (🍬) alone induces a large bias in Q-estimation.

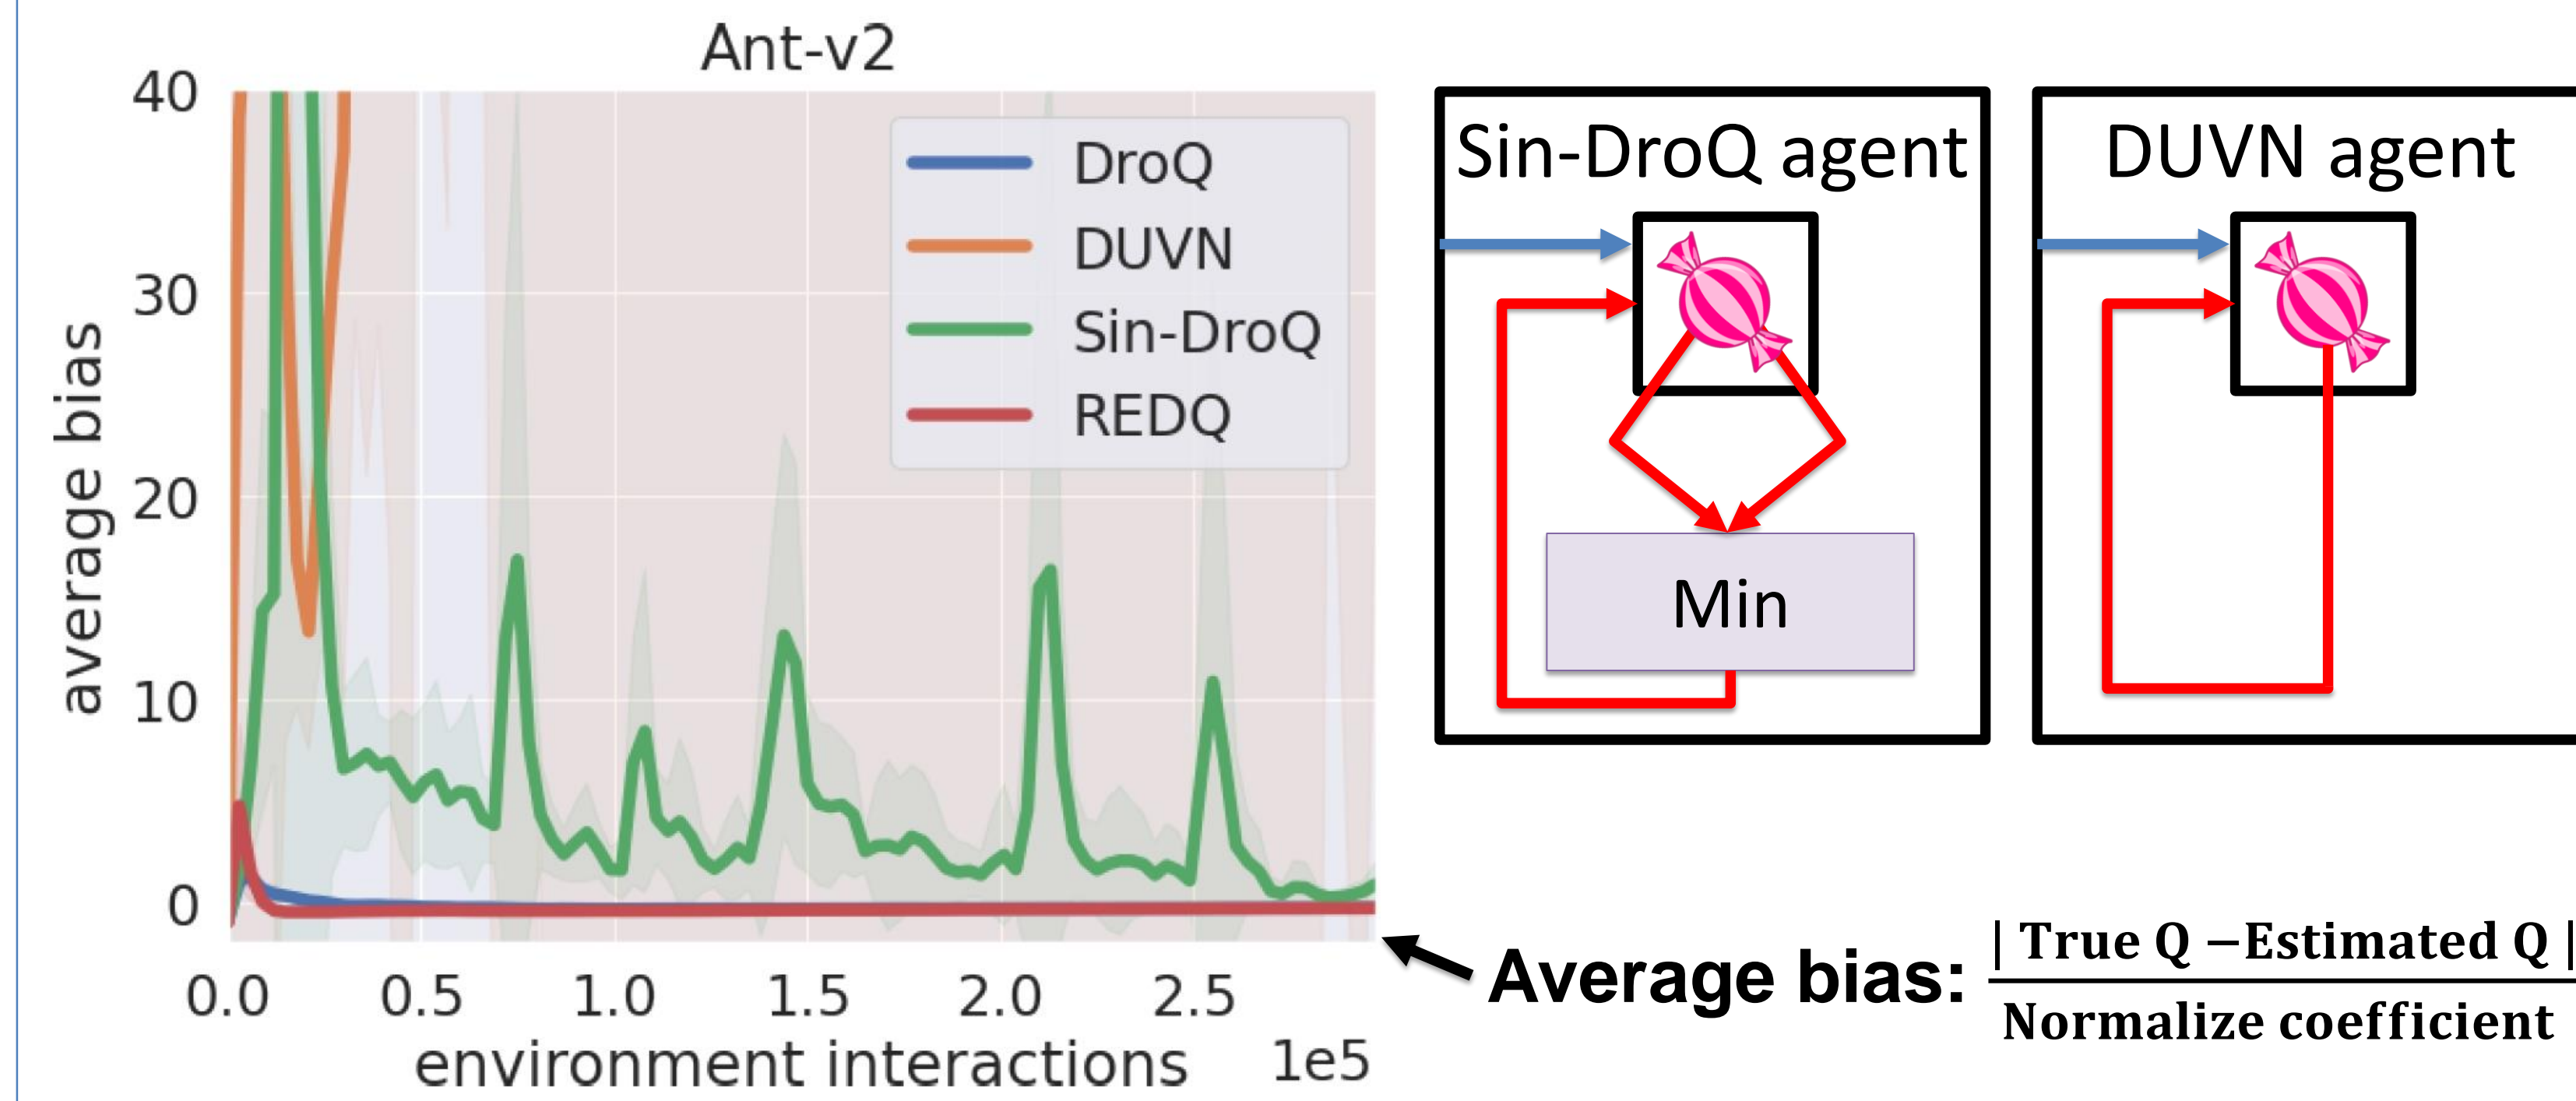

## 4. Experiments:

- Q. How sample-efficient is DroQ (—)?**  
 A. Much better than SAC (—) and almost the same as REDQ (—).

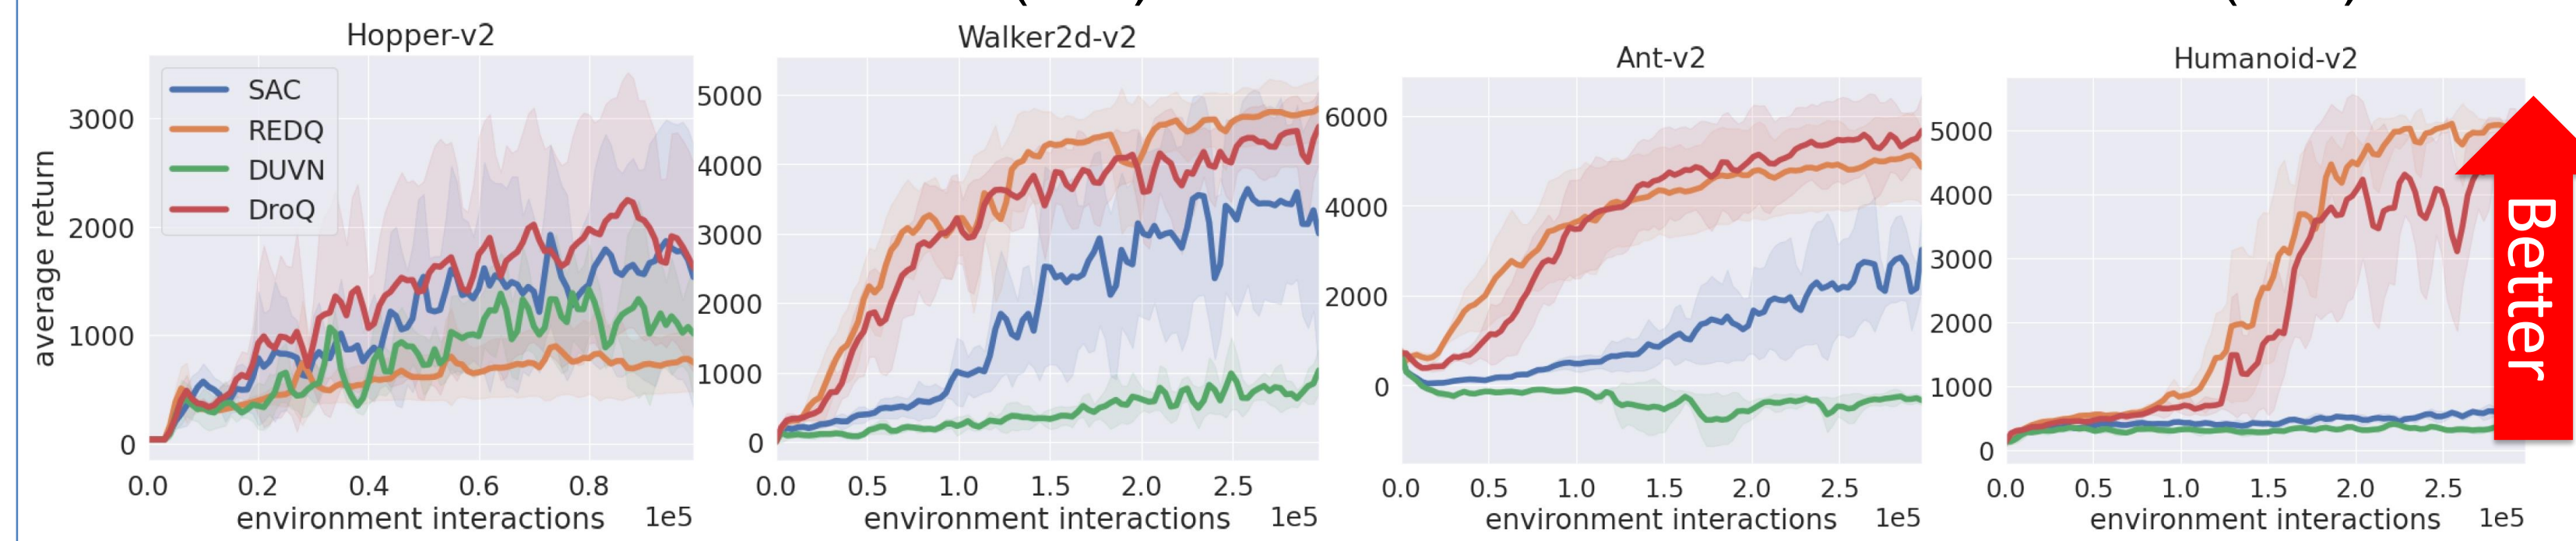

- Q. How computationally efficient is DroQ?**  
 A. Much better than REDQ and almost the same as SAC.

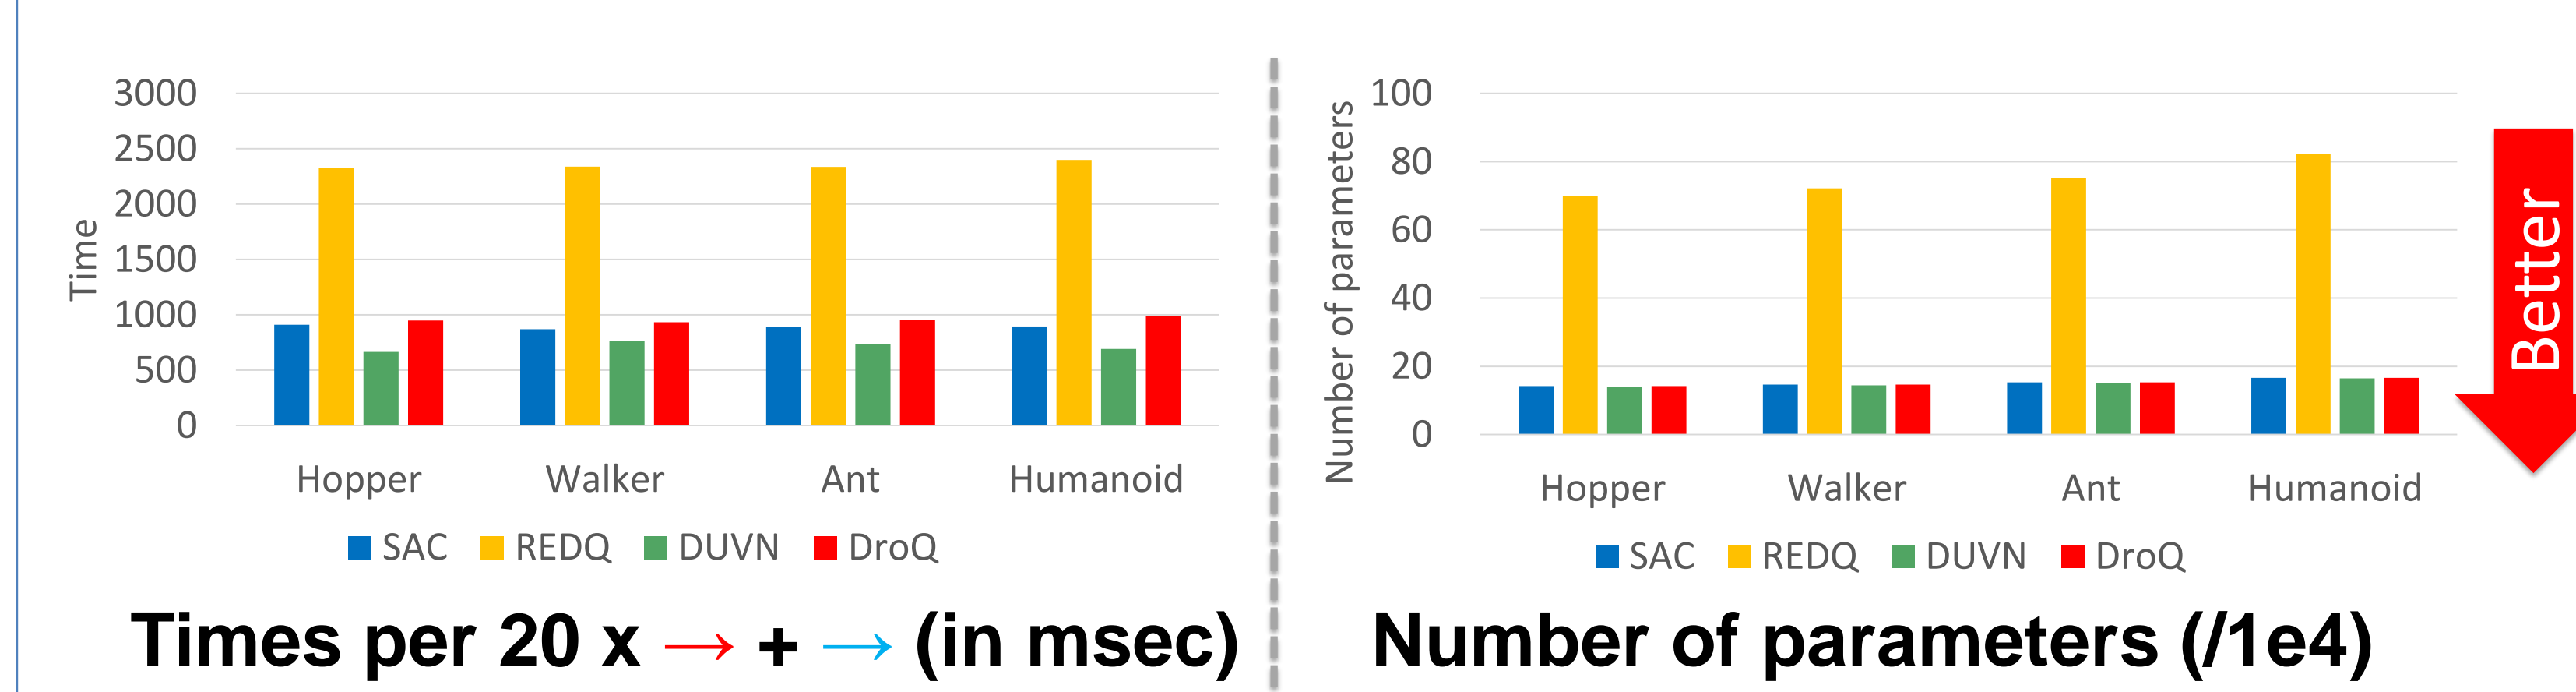

## 5. Conclusion:

- DroQ (REDQ + 🍬🍬) is simple but doubly efficient.

Our source code is available at

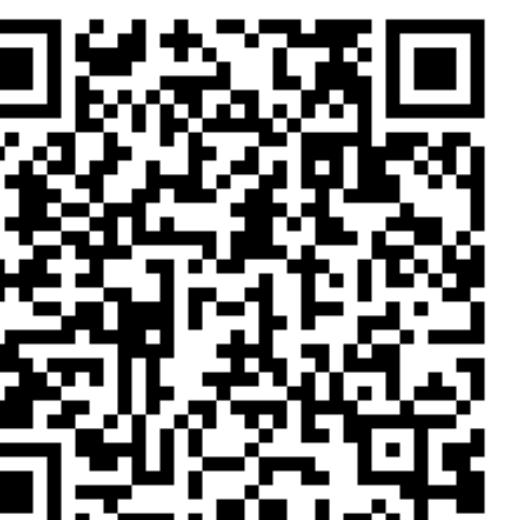

Supplement: supplementary_material [file attachment]
