# Supplementary material
Source: ML conference proceedings conference paper supplement (https://openreview.net/forum?id=xCVJMsPv3RT)
Supplement: supplementary_material [file attachment]

# Dropout Q-Functions for Doubly Efficient Reinforcement Learning

Takuya Hiraoka<sup>1,2</sup>, Takahisa Imagawa<sup>2</sup>, Taisei Hashimoto<sup>2,3</sup>,  
Takashi Onishi<sup>1,2</sup>, and Yoshimasa Tsuruoka<sup>2,3</sup>

<sup>1</sup> NEC Corporation, <sup>2</sup> AIST, <sup>3</sup> The University of Tokyo

In general, **doubly efficient** RL methods that are not only **sample efficient** but also **computational efficient** are preferable.

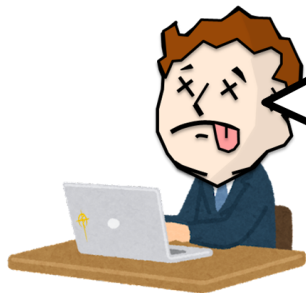

EVERYONE SAYS THIS RL ALGORITHM IS SAMPLE EFFICIENT,  
BUT IT'S TOO SLOW AND TOO HEAVY TO RUN ON MY LAPTOP.  
NOT SURE WHEN MY HYPER-PARAMETER TUNING ENDS...

# Introduction (Contd.)

■ We propose **DroQ**, a simple but doubly efficient RL method, by introducing dropout Q-functions (  ) to REDQ.

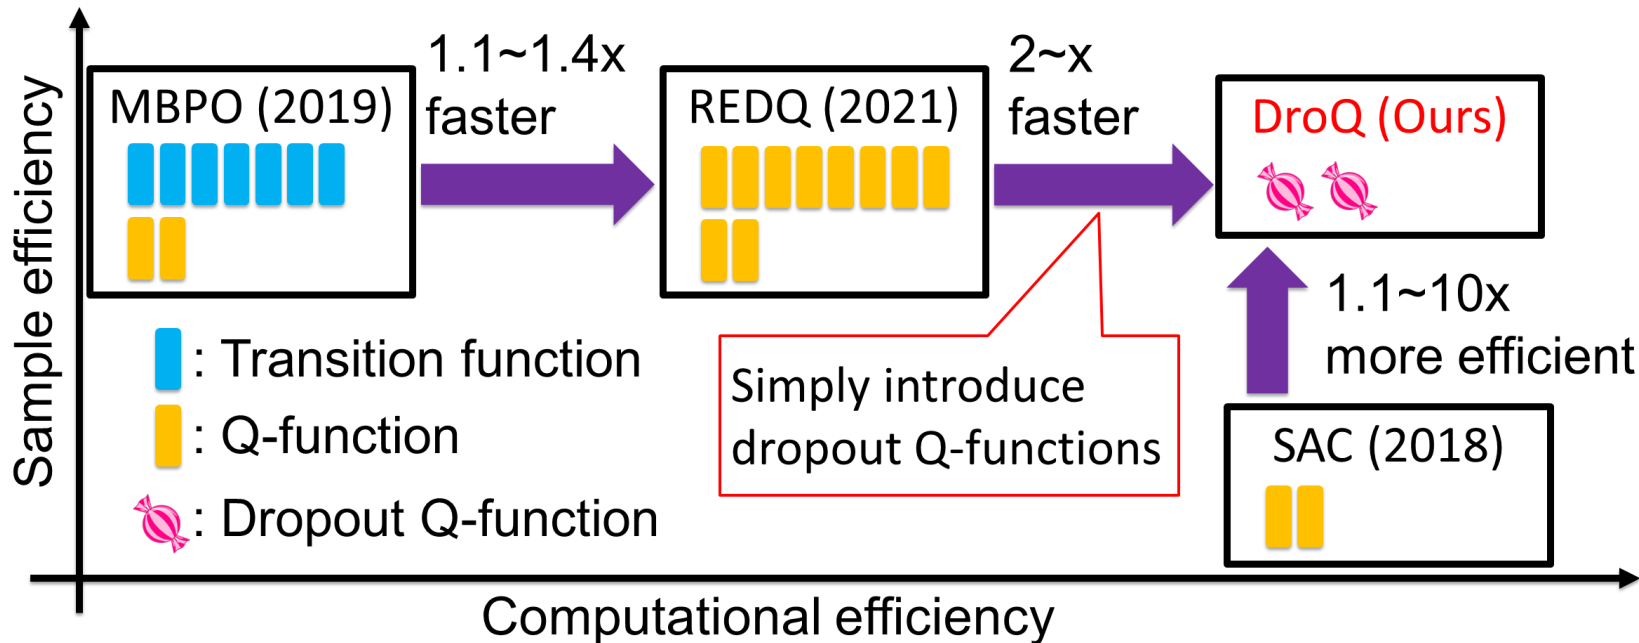

# REDQ: Randomized Ensembled Double Q

REDQ (Chen, 2021) is a sample-efficient RL method equipped with

- **High update-to-data (UTD) ratio:** number of Q updates ( $\rightarrow$ ) per environment interaction ( $\rightarrow$ ) is high (e.g., 20 updates per interaction).
- **Randomized ensemble:** a randomly selected subset () of ensemble () is used at the target () in the Q update ( $\rightarrow$ ).

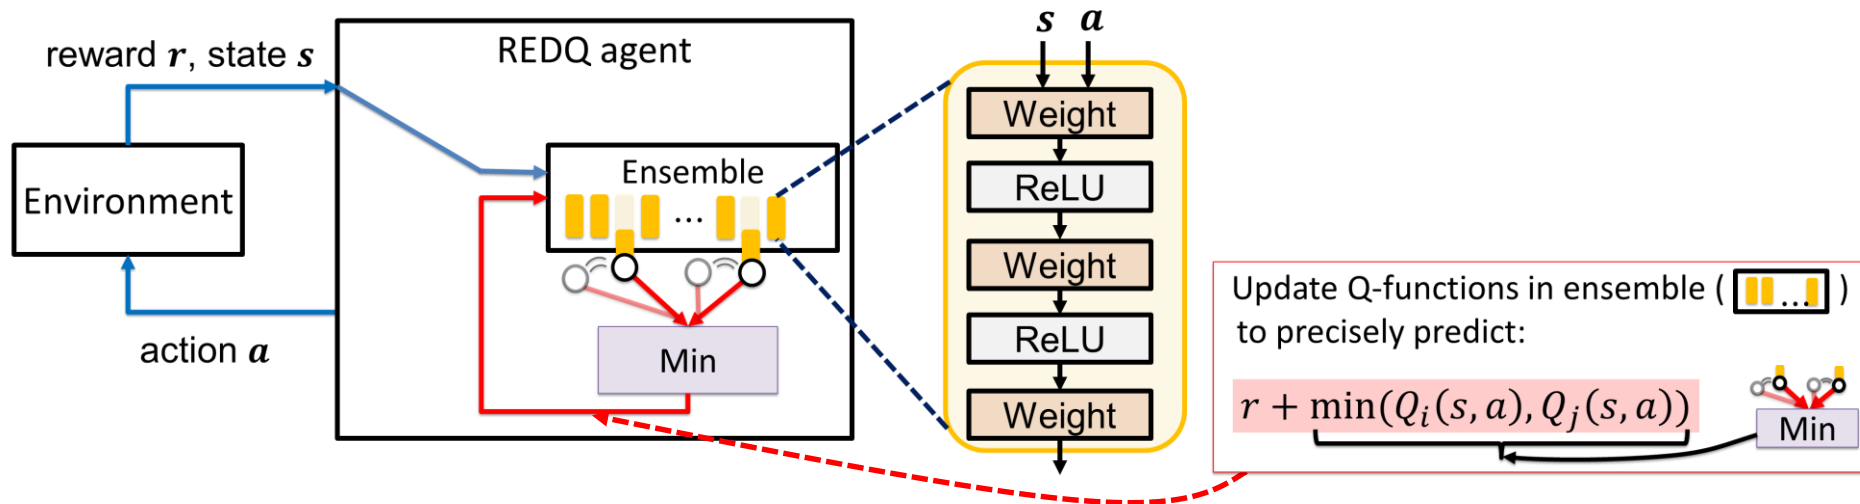

# DroQ, the proposed method

DroQ is a REDQ variant using a small ensemble of dropout Q-functions (  ) in which dropout ( **Dropout** ) and layer normalization ( **LayerNorm** ) are used.

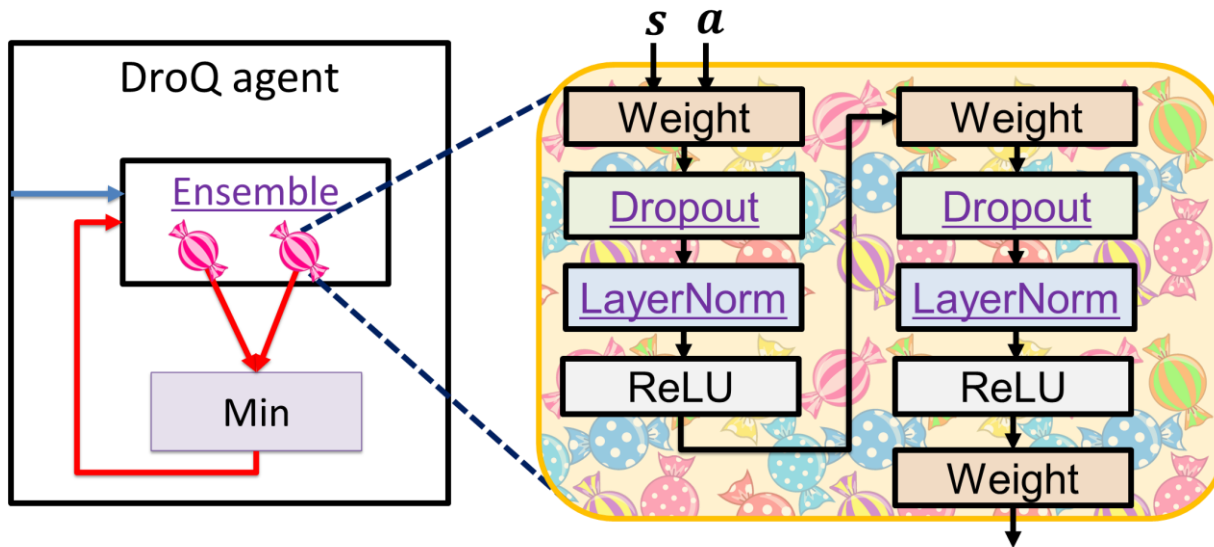

# Q. How sample-efficient is **DroQ** ( — )?

A. Better than **SAC** ( — ) and almost the same as **REDQ** ( — ).

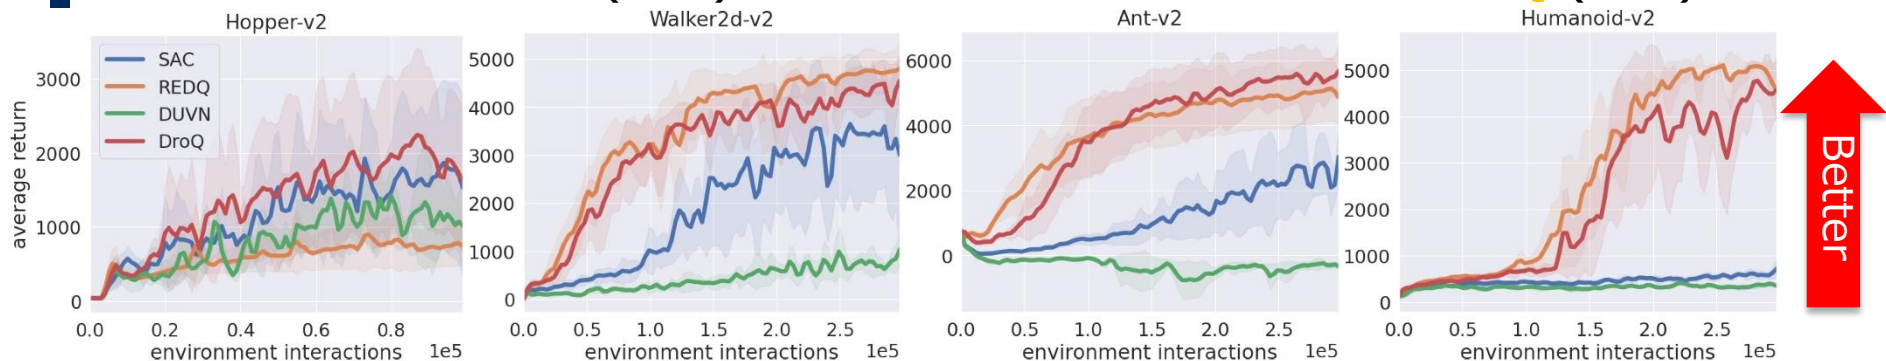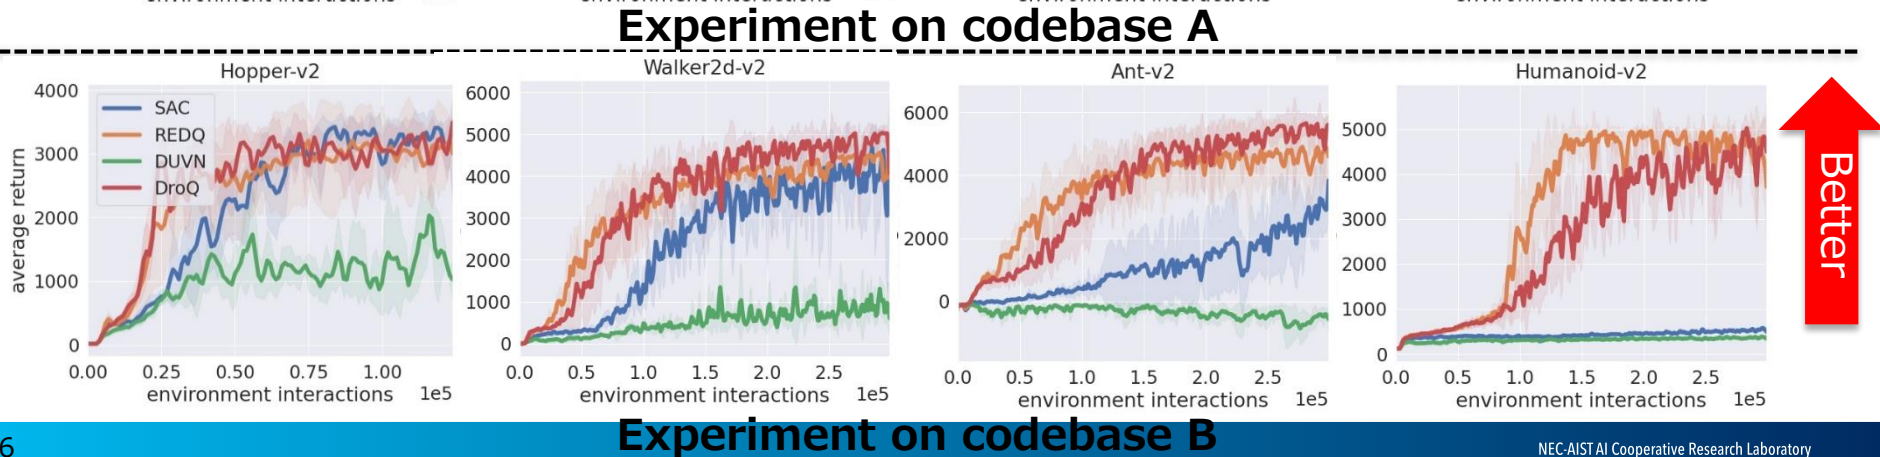

# Q. How computationally efficient is **DroQ**?

A. Much better than **REDQ** and almost the same as **SAC**.

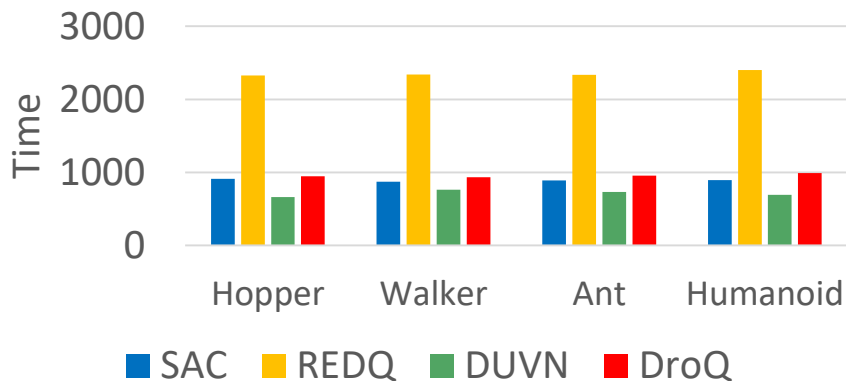

**Times per 20 updates  
+ 1 interaction (in msec)**

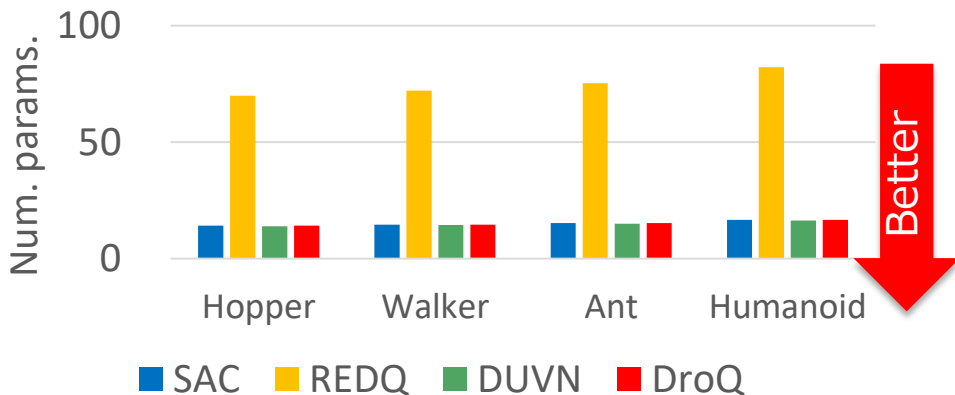

**Number of parameters (/1e4)**

# Conclusion

■ DroQ (REDQ +  ) is simple but doubly efficient.

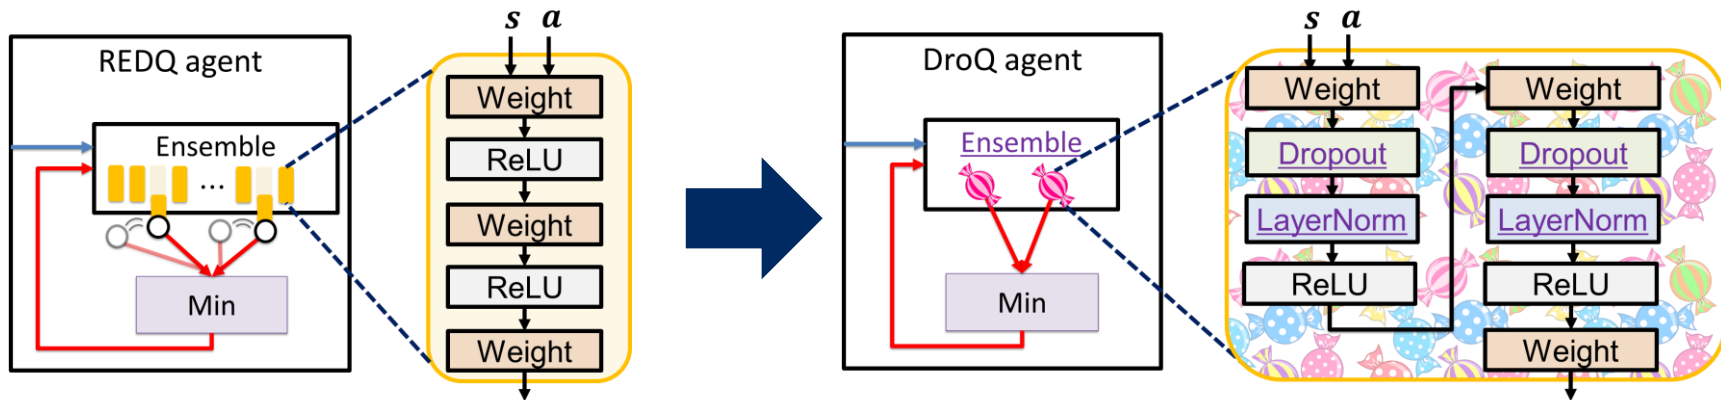

■ Are you interested in our work?  
Or feel that all we did was just randomly changing modules  
of the existing RL method?



# INTRODUCTION TO OUR POSTER

# Q. Why is dropout (Dropout) needed?

- A. To inject Q-function uncertainty (  ) to the target ( Min ), similarly to REDQ.

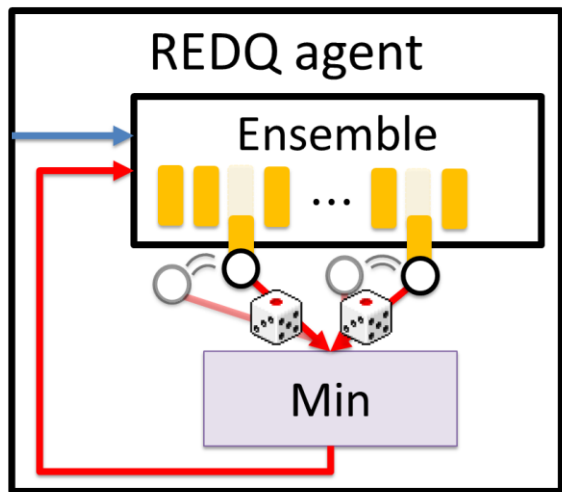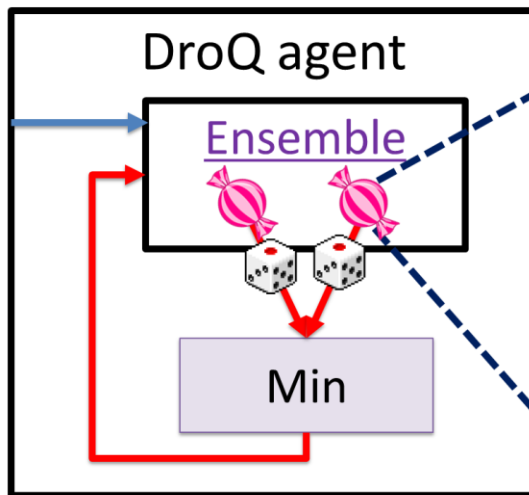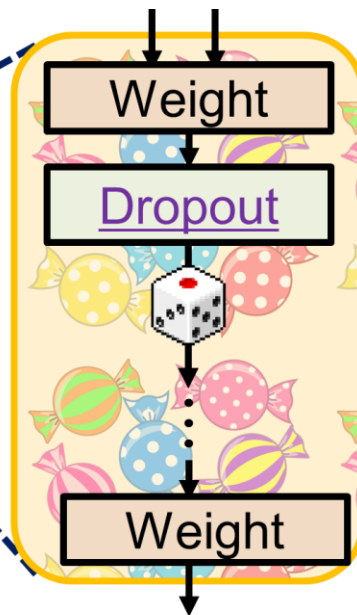

Q. Why is layer normalization (**LayerNorm**) needed?

A. To suppress (↓) the learning instability caused by dropout.

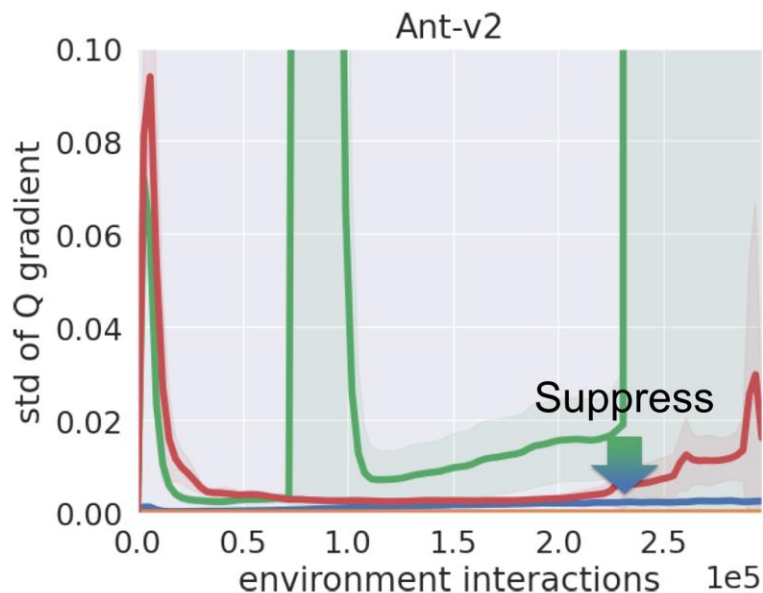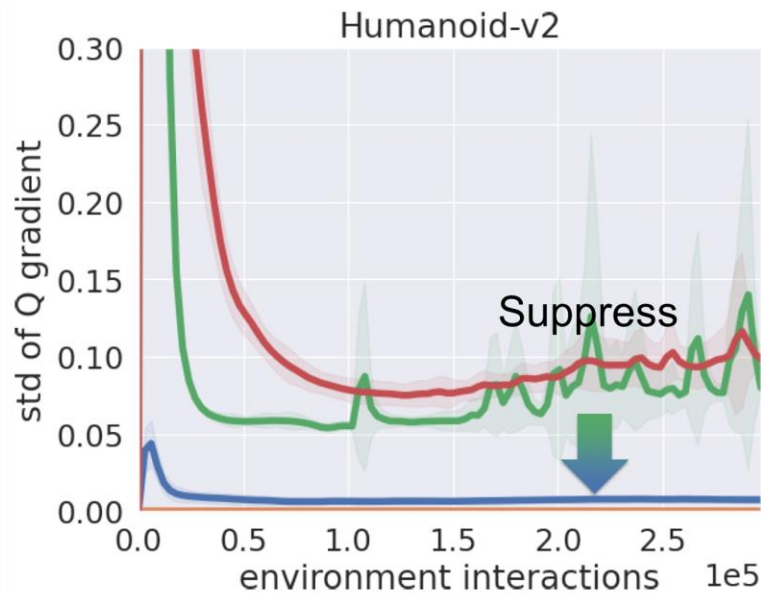

**The standard deviation of the gradient of Q-loss w.r.t. parameters**

— DroQ — w/o Dropout — w/o LayerNorm — w/o Dropout nor LayerNorm

# Q. Why is a small ensemble ( ) needed?

A. Using a single dropout Q-function (  ) alone induces a large bias in Q-estimation.

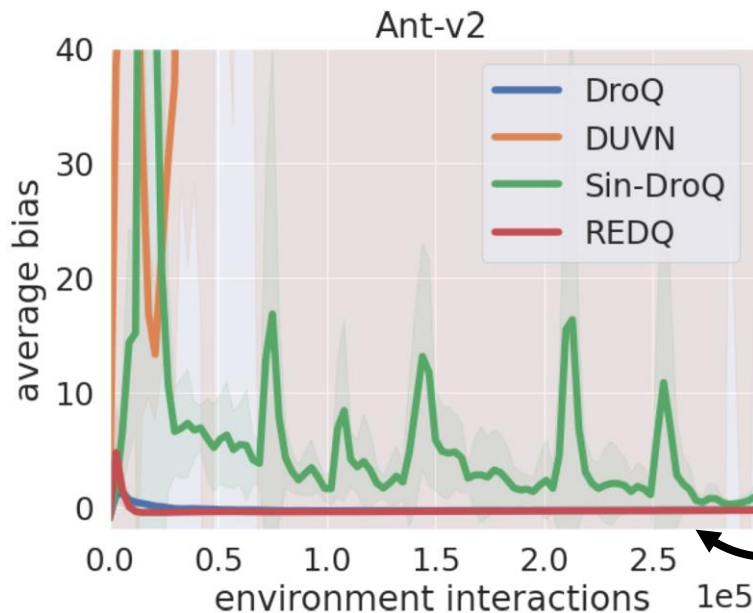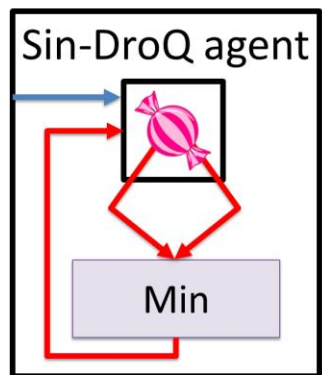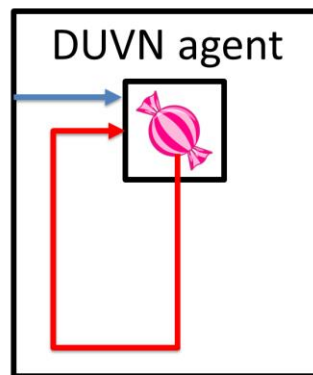

Q-estimates bias calculated as  $\frac{| \text{True Q} - \text{Estimated Q} |}{\text{Normalize coefficient}}$

## 1. Introduction:

- In general, RL methods that are not only **sample efficient** but also **computational efficient** (i.e., **doubly efficient**) are preferable.

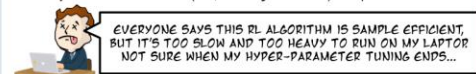

- We propose DroQ, a simple but doubly efficient RL method, by introducing a small ensemble of Dropout Q-functions (🍷) to REDQ.

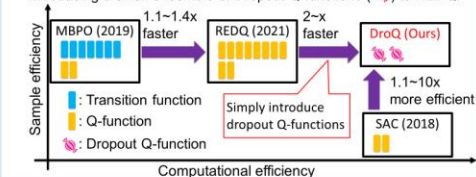

## 2. Randomized Ensemble Double Q-Learning (REDQ):

- REDQ (Chen, 2021) is a sample-efficient RL method equipped with **high update-to-data (UTD) ratio** and **randomized ensemble**.
- High UTD ratio**: number of Q updates (→) per environment interaction (↔) is high (e.g., 20 updates per interaction).
- Randomized ensemble**: a randomly selected subset (🍷) of ensemble (🍷) is used at the target (Min) in the Q update (→).

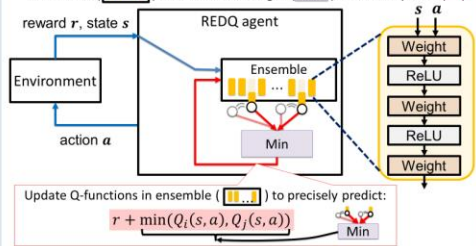

## 3. DroQ, the proposed method:

- DroQ is a REDQ variant using a **small ensemble of dropout Q-functions** (🍷) in which dropout (Dropout) and layer normalization (LayerNorm) are used.

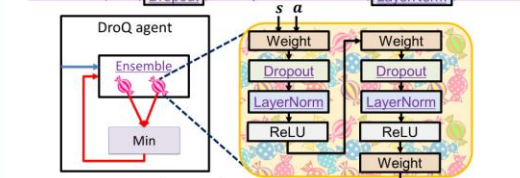

- Q. Why is dropout (Dropout) needed?**

- A. To inject Q-function uncertainty (🍷) to the target (Min), similarly to REDQ.

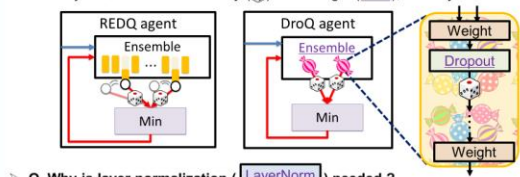

- Q. Why is layer normalization (LayerNorm) needed?**

- A. To suppress (🍷) the learning instability caused by dropout.

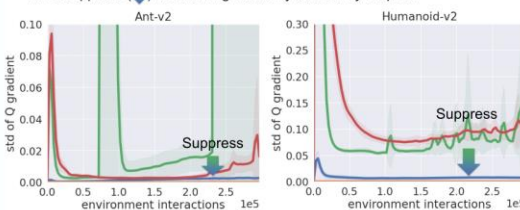

The standard deviation of the gradient of Q-loss w.r.t. parameters

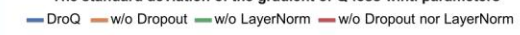

## 3.5. DroQ, the proposed method (Contd.):

- Q. Why is a small ensemble (🍷) needed?**  
(Why not use a single dropout Q-function (🍷) alone?)

- A. Using it (🍷) alone induces a large bias in Q-estimation.

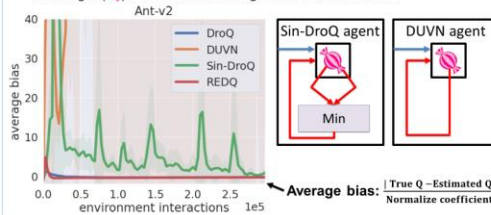

## 4. Experiments:

- Q. How sample-efficient is DroQ (🍷)?**

- A. Much better than SAC (🍷) and almost the same as REDQ (🍷).

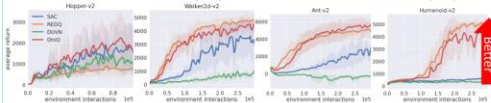

- Q. How computationally efficient is DroQ?**

- A. Much better than REDQ (🍷) and almost the same as SAC (🍷).

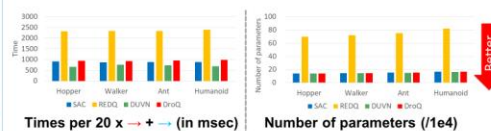

## 5. Conclusion:

- DroQ (REDQ + 🍷) is simple but doubly efficient.

Our source code is available at

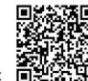

# Thank you for watching this video!

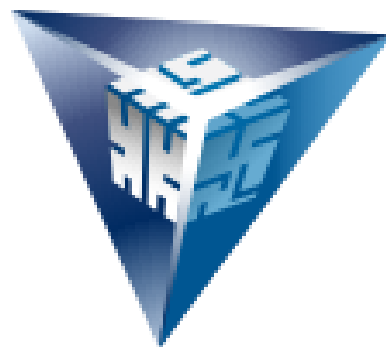

NEC-AIST  
AI Cooperative  
Research Laboratory
